# Supplementary material for: A Computational Approach with Biological Evaluation: Combinatorial Treatment of Curcumin and Exemestane Synergistically Regulates DDX3 Expression in Cancer Cell Lines
Source: PubMed Central journal article supplement (PMC7355417; doi:10.3390/biom10060857), 2020-06-04
Supplement: biomolecules-10-00857-s001.pdf [file biomolecules-10-00857-s001.pdf]

## Structure-based

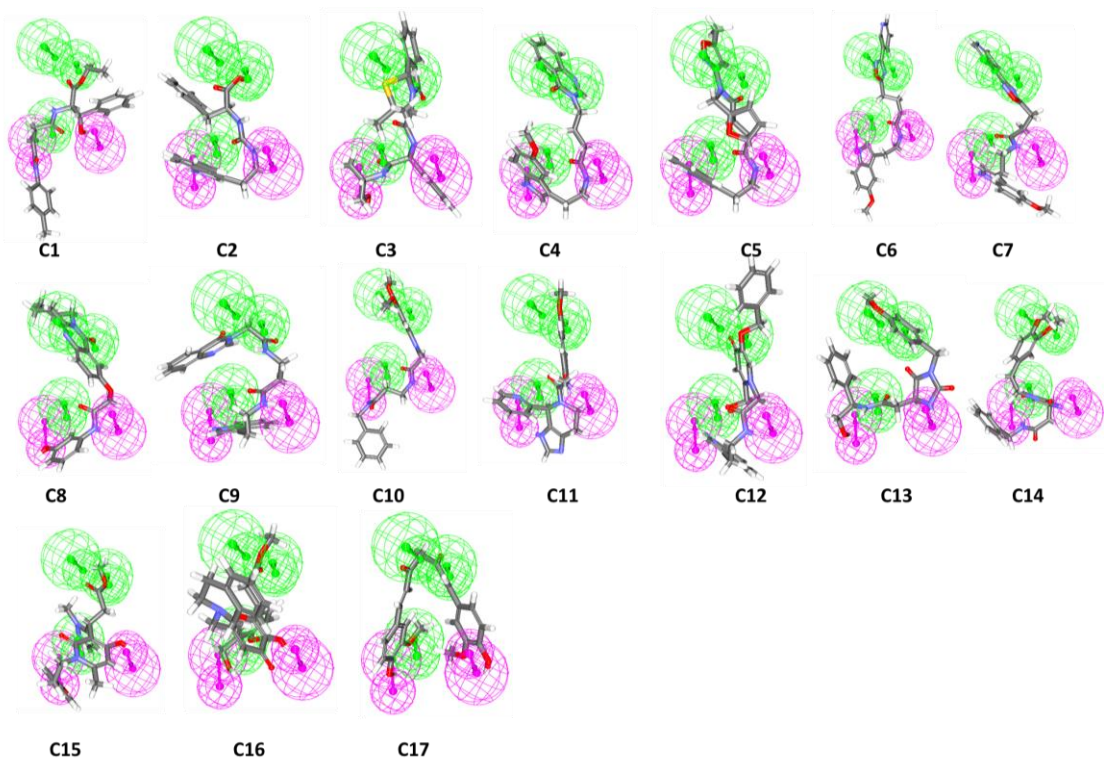

## Ligand-based

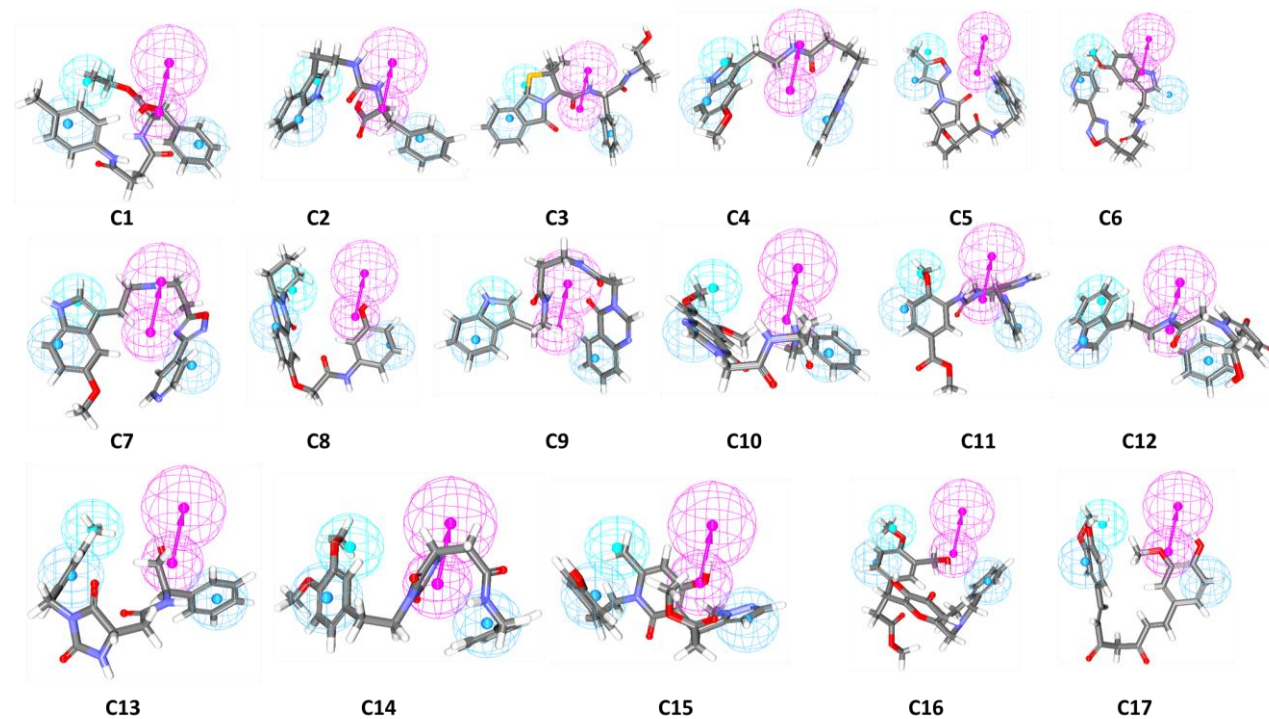

Supplementary Figure 1: Retrieved compounds alignment to pharmacophore models
